# Supplementary material
Source: PubMed Central journal article supplement (PMC4540249)
Supplement: supp_WNL.0000000000001828_Table_e-1.pdf [file supp_WNL.0000000000001828_Table_e-1.pdf]

| Participant | Gender | Age (years) | Ethnicity        | Time Since Injury (months) | Group | TOAST | FM | SIS | Barthel | NIHSS | RMT <sub>NL</sub> |
|-------------|--------|-------------|------------------|----------------------------|-------|-------|----|-----|---------|-------|-------------------|
| 1           | F      | 66          | Caucasian        | 50.9                       | CX    | 3     | 7  | 286 | 100     | 6     | 44                |
| 2           | F      | 81          | Caucasian        | 18.7                       | CX    | 1     | 7  | 153 | 70      | 11    | 40                |
| 3           | M      | 71          | Caucasian        | 13.3                       | CX    | 3     | 7  | 179 | 75      | 13    | 35                |
| 4           | F      | 76          | African American | 16.6                       | CX    | 3     | 8  | 123 | 15      | 14    | 45                |
| 5           | M      | 72          | Caucasian        | 48.2                       | CX    | 2     | 9  | 177 | 85      | 7     | 70                |
| 6           | F      | 48          | Caucasian        | 46.2                       | CX    | 3     | 9  | 219 | 100     | 4     | 45                |
| 7           | M      | 63          | Caucasian        | 105.8                      | CX    | 3     | 9  | 189 | 80      | 9     | 62                |
| 8           | M      | 56          | Caucasian        | 32                         | CX    | 2     | 10 | 224 | 95      | 7     | 46                |
| 9           | M      | 62          | Caucasian        | 65.5                       | CX    | 3     | 12 | 181 | 85      | 10    | 33                |
| 10          | F      | 54          | African American | 28.9                       | CX    | 1     | 13 | 188 | 95      | 5     | 42                |
| 11          | F      | 49          | Caucasian        | 73.2                       | CX    | 3     | 16 | 227 | 100     | 6     | 45                |
| 12          | F      | 81          | Caucasian        | 5                          | CX    | 4     | 18 | 203 | 95      | 4     | 62                |
| 13          | F      | 66          | Caucasian        | 69.7                       | CX    | 3     | 19 | 214 | 95      | 5     | 48                |
| 14          | M      | 69          | Caucasian        | 18.9                       | CX    | 2     | 21 | 187 | 90      | 5     | 42                |
| 15          | M      | 68          | Caucasian        | 51.6                       | CX    | 2     | 22 | 220 | 95      | 2     | 35                |
| 16          | F      | 65          | Caucasian        | 105.8                      | CX    | 4     | 24 | 233 | 100     | 4     | 100               |
| 17          | M      | 63          | Caucasian        | 52.5                       | CX    | 1     | 25 | 207 | 95      | 6     | 75                |
| 18          | M      | 56          | Asian            | 50.8                       | CX    | 3     | 29 | 240 | 100     | 2     | 40                |
| 19          | M      | 61          | Asian            | 113.8                      | CX    | 3     | 39 | 222 | 100     | 4     | 90                |
| 20          | F      | 77          | Caucasian        | 74.5                       | CX    | 3     | 41 | 233 | 100     | 4     | 48                |
| 21          | M      | 62          | Caucasian        | 121.2                      | CX    | 1     | 44 | 253 | 100     | 4     | 40                |
| 22          | M      | 60          | Caucasian        | 21.8                       | CX    | 2     | 47 | 240 | 100     | 4     | 31                |
| 23          | M      | 80          | Caucasian        | 231.2                      | SC    | 4     | 7  | 205 | 75      | 9     | 31                |
| 24          | M      | 80          | Caucasian        | 32.1                       | SC    | 1     | 7  | 187 | 80      | 7     | 70                |
| 25          | F      | 83          | African American | 8.4                        | SC    | 1     | 9  | 180 | 80      | 5     | 44                |
| 26          | M      | 77          | Caucasian        | 108.8                      | SC    | 3     | 9  | 191 | 95      | 4     | 41                |
| 27          | F      | 80          | Caucasian        | 89.2                       | SC    | 3     | 11 | 210 | 100     | 5     | 47                |
| 28          | F      | 78          | Caucasian        | 44.4                       | SC    | 3     | 13 | 207 | 60      | 5     | 48                |
| 29          | F      | 73          | Caucasian        | 53.4                       | SC    | 3     | 13 | 226 | 95      | 4     | 46                |
| 30          | M      | 66          | Caucasian        | 116.7                      | SC    | 2     | 24 | 190 | 100     | 0     | 33                |
| 31          | F      | 71          | Caucasian        | 54.1                       | SC    | 3     | 36 | 242 | 100     | 4     | 70                |
| 32          | M      | 78          | Caucasian        | 47.7                       | SC    | 3     | 39 | 261 | 100     | 1     | 80                |
| 33          | M      | 76          | Caucasian        | 56.4                       | SC    | 3     | 44 | 236 | 100     | 1     | 90                |
| 34          | F      | 75          | African American | 10.7                       | SC    | 3     | 51 | 219 | 95      | 0     | 100               |

**Table e-1:** Clinical details for each participant in the Cx and SC groups. TOAST category, FM (Fugyl-Meyer), SIS (stroke impact scale), Barthel Index, NIHSS (National Institutes for Health stroke scale), and RMT (resting motor threshold for the non-lesioned hemisphere)
